# Supplementary material
Source: Springer Nature journal article supplement (https://www.springermedizin.de/resource/supplementary/12935_2011_320_MOESM14_ESM.pdf/9540326)

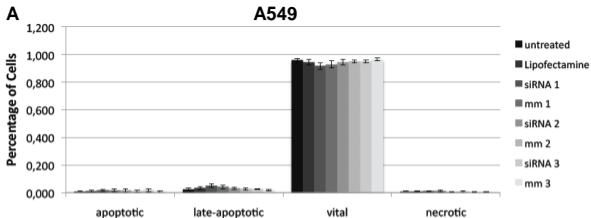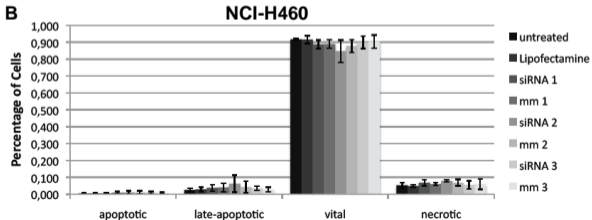

Supplement: MOESM14 [file 9540326]
